# Supplementary material for: Dipeptidyl Peptidase‐4 Is a Target Protein of Epigallocatechin‐3‐Gallate
Source: Hindawi journal article supplement (doi:10.1155/2020/5370759), 2020-01-01
Supplement: f1 [file 5370759.f1.pdf]

1 **Supplementary materials**

2 Figure S1. Root mean square fluctuation (RMSF) of the backbone of DPP4  
3 during 100-ns MD simulation.

4 Figure S2. A representation of the interactions and contacts over time. The  
5 top panel shows the total number of specific contacts DPP4 makes with  
6 EGCG over the simulation. The bottom panel shows which residues  
7 interact with EGCG in each trajectory frame.

8 Figure S3. Normalized stacked bar chart representation of interactions and  
9 contacts over the course of the MD simulation trajectory.

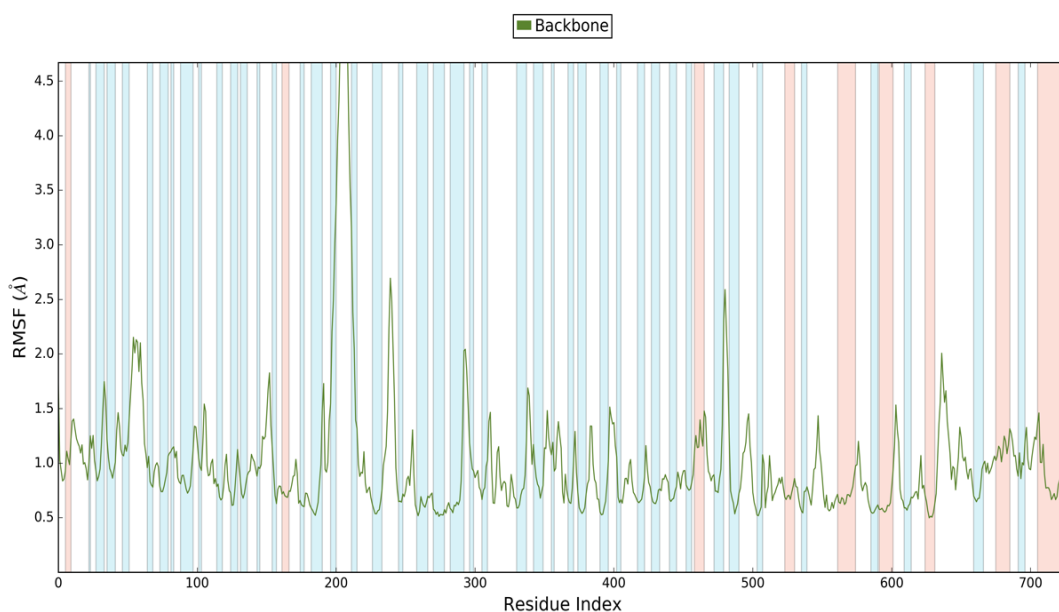

10

11

Figure S1

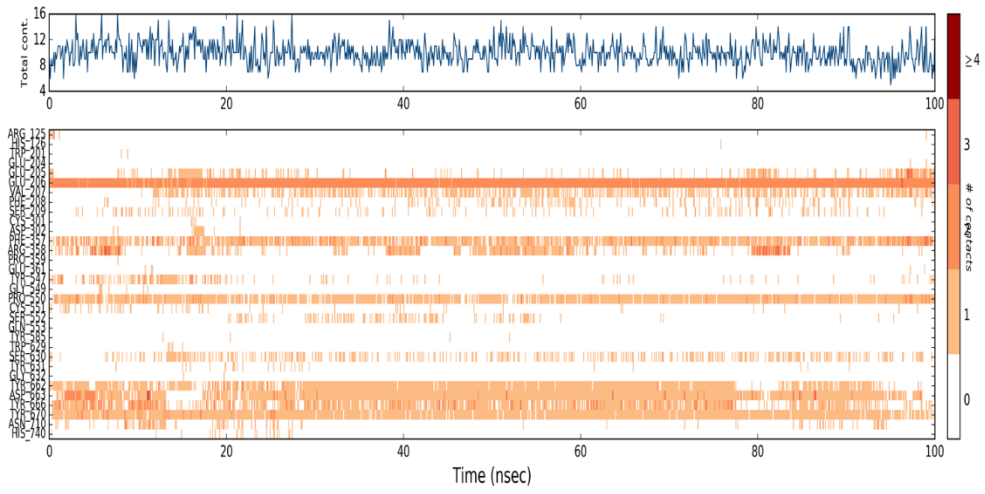

12

13

Figure S2

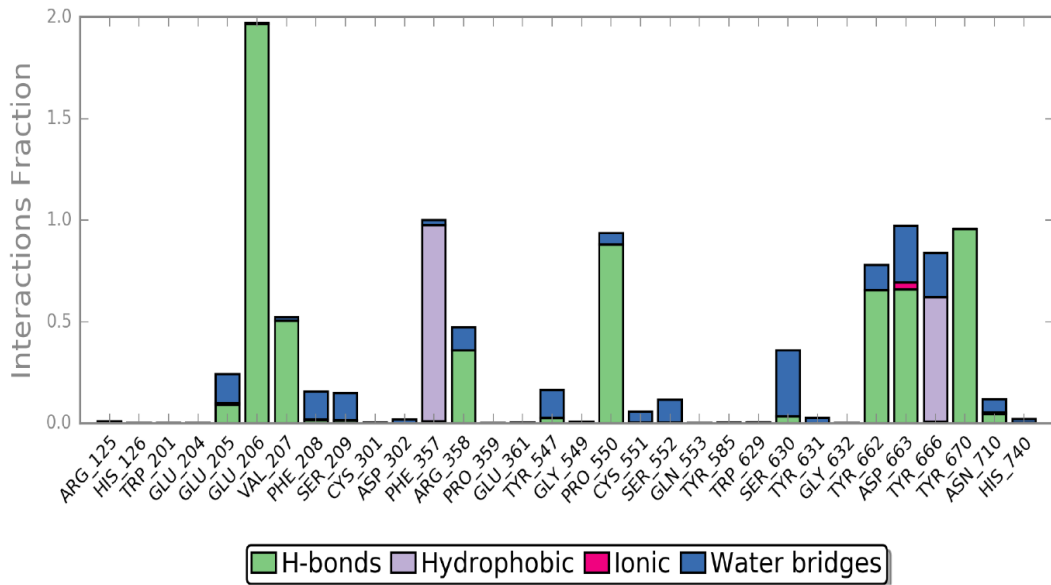

14

15

16

Figure S3
